# Supplementary material for: A Survey of Paediatric Rapid Sequence Induction in a Department of Anaesthesia
Source: Children (Basel). 2022 Sep 19;9(9):1416. doi: 10.3390/children9091416 (PMC9497683; doi:10.3390/children9091416)
Supplement: Supplementary file 1 [file children-09-01416-s001.zip › children-1877775-supplementary.pdf]

## A survey of rapid sequence induction (RSI) and intubation practice in paediatric patients

Tick the appropriate block

1. What grade of anaesthetist are you?

|                           |  |
|---------------------------|--|
| Medical officer           |  |
| Junior registrar (<2yrs)  |  |
| Senior registrar (>2yrs)  |  |
| Principal medical officer |  |
| Consultant < 5 years      |  |
| Consultant 5 – 10 years   |  |
| Consultant >10 years      |  |

2. For registrars only – How long ago did you complete your paediatric training block?

|                             |  |
|-----------------------------|--|
| Have not yet done the block |  |
| Currently doing the block   |  |
| 0 - 12 months ago           |  |
| 1 – 2 years ago             |  |
| > 2 years ago               |  |

3. For consultants only – How often do you anaesthetise children?

|                              |  |
|------------------------------|--|
| At least one list per week   |  |
| At least one list per month  |  |
| Less than one list per month |  |
| Never                        |  |

4. For which of the following cases would you use a RSI technique?  
(You can choose more than one option)

|                                                                 |  |
|-----------------------------------------------------------------|--|
| Any emergency case                                              |  |
| A non-fasted patient                                            |  |
| An upper GIT obstruction                                        |  |
| A lower GIT obstruction                                         |  |
| Appendicitis with localized pain and soft abdomen               |  |
| Appendicitis with distended abdomen and generalized peritonitis |  |
| A patient with bulbar palsy                                     |  |
| Insulin dependent diabetes mellitus                             |  |
| Renal failure                                                   |  |

5. In your opinion, what are the **2** most important components of a *controlled* RSI?  
(Choose 2)

|                                                                        |  |
|------------------------------------------------------------------------|--|
| Attempting laryngoscopy and intubation immediately after induction     |  |
| Maintaining oxygenation using appropriate bag-mask ventilation         |  |
| Waiting for the 'magical minute' before intubating the patient         |  |
| The use of cricoid pressure                                            |  |
| Ensuring adequate depth of anaesthesia and paralysis before intubation |  |

**During a RSI for paediatric patients:**

Key:

|         |                |
|---------|----------------|
| Neonate | < 28 days old  |
| Infant  | 1 month-1 year |
| Child   | 1-12 years     |

1. Which is your preferred method of pre-oxygenation for

**(A) a neonate:**

|                                                      |  |                                |  |
|------------------------------------------------------|--|--------------------------------|--|
| Normal tidal breathing<br>If so, for how long? ..... |  | Do not attempt pre-oxygenation |  |
|------------------------------------------------------|--|--------------------------------|--|

**(B) an infant:**

|                                                      |  |                                |  |
|------------------------------------------------------|--|--------------------------------|--|
| Normal tidal breathing<br>If so, for how long? ..... |  | Do not attempt pre-oxygenation |  |
|------------------------------------------------------|--|--------------------------------|--|

**(C) a child**

|                                                      |  |                                                   |  |                                   |  |
|------------------------------------------------------|--|---------------------------------------------------|--|-----------------------------------|--|
| Normal tidal breathing<br>If so, for how long? ..... |  | Vital capacity breaths. If<br>so, how many? ..... |  | Do not attempt<br>pre-oxygenation |  |
|------------------------------------------------------|--|---------------------------------------------------|--|-----------------------------------|--|

2. Which induction agent do you use in a haemodynamically stable patient for

**(A) a neonate**

|          |  |          |  |           |  |             |  |                 |  |
|----------|--|----------|--|-----------|--|-------------|--|-----------------|--|
| Propofol |  | Ketamine |  | Etomidate |  | Sevoflurane |  | Other (specify) |  |
|----------|--|----------|--|-----------|--|-------------|--|-----------------|--|

**(B) an infant**

|          |  |          |  |           |  |             |  |                 |  |
|----------|--|----------|--|-----------|--|-------------|--|-----------------|--|
| Propofol |  | Ketamine |  | Etomidate |  | Sevoflurane |  | Other (specify) |  |
|----------|--|----------|--|-----------|--|-------------|--|-----------------|--|

**(C) a child**

|          |  |          |  |           |  |             |  |                 |  |
|----------|--|----------|--|-----------|--|-------------|--|-----------------|--|
| Propofol |  | Ketamine |  | Etomidate |  | Sevoflurane |  | Other (specify) |  |
|----------|--|----------|--|-----------|--|-------------|--|-----------------|--|

3. Which paralysing agent do you use during induction for

**(A) a neonate**

|               |  |            |  |                 |  |      |  |                 |  |
|---------------|--|------------|--|-----------------|--|------|--|-----------------|--|
| Suxamethonium |  | Rocuronium |  | Cis-/atracurium |  | None |  | Other (specify) |  |
|---------------|--|------------|--|-----------------|--|------|--|-----------------|--|

**(B) an infant**

|               |  |            |  |                 |  |      |  |                 |  |
|---------------|--|------------|--|-----------------|--|------|--|-----------------|--|
| Suxamethonium |  | Rocuronium |  | Cis-/atracurium |  | None |  | Other (specify) |  |
|---------------|--|------------|--|-----------------|--|------|--|-----------------|--|

**(C) a child**

|               |  |            |  |                 |  |      |  |                 |  |
|---------------|--|------------|--|-----------------|--|------|--|-----------------|--|
| Suxamethonium |  | Rocuronium |  | Cis-/atracurium |  | None |  | Other (specify) |  |
|---------------|--|------------|--|-----------------|--|------|--|-----------------|--|

4. Do you use cricoid pressure in

(A) a neonate 

|     |  |    |  |
|-----|--|----|--|
| YES |  | NO |  |
|-----|--|----|--|

(B) an infant 

|     |  |    |  |
|-----|--|----|--|
| YES |  | NO |  |
|-----|--|----|--|

(C) a child 

|     |  |    |  |
|-----|--|----|--|
| YES |  | NO |  |
|-----|--|----|--|

5. Do you use bag-mask-ventilation during a RSI in

(A) a neonate 

|     |  |    |  |
|-----|--|----|--|
| YES |  | NO |  |
|-----|--|----|--|

(B) an infant 

|     |  |    |  |
|-----|--|----|--|
| YES |  | NO |  |
|-----|--|----|--|

(C) a child 

|     |  |    |  |
|-----|--|----|--|
| YES |  | NO |  |
|-----|--|----|--|

If so, what is your maximum inspiratory pressure used while bag-mask-ventilating the patient?

|                            |  |
|----------------------------|--|
| <12 cmH <sub>2</sub> O     |  |
| 12 – 16 cmH <sub>2</sub> O |  |
| >16 cmH <sub>2</sub> O     |  |

6. Do you use a nerve stimulator to monitor adequate paralysis prior to intubation?

|     |  |    |  |
|-----|--|----|--|
| YES |  | NO |  |
|-----|--|----|--|

7. Do you use ultrasound to assess the presence of gastric content prior to a RSI?

|     |  |    |  |
|-----|--|----|--|
| YES |  | NO |  |
|-----|--|----|--|

8. Do you routinely assess clinical parameters of volume-status prior to performing a RSI for a paediatric patient?

|     |  |    |  |
|-----|--|----|--|
| YES |  | NO |  |
|-----|--|----|--|

9. Do you use a cuffed or uncuffed endotracheal tube for a paediatric patient at risk of pulmonary aspiration in:

(A) a neonate 

|        |  |          |  |
|--------|--|----------|--|
| cuffed |  | uncuffed |  |
|--------|--|----------|--|

(B) an infant 

|        |  |          |  |
|--------|--|----------|--|
| cuffed |  | uncuffed |  |
|--------|--|----------|--|

(C) a child 

|        |  |          |  |
|--------|--|----------|--|
| cuffed |  | uncuffed |  |
|--------|--|----------|--|

10. Would you find it useful to have guidelines which direct you on the conduct of RSI for paediatric patients?

|     |  |    |  |
|-----|--|----|--|
| YES |  | NO |  |
|-----|--|----|--|

### Clinical Scenarios:

You are asked to anaesthetise the patient in the following scenarios:

Please describe the technique you would most commonly use to establish anaesthesia by indicating on the table, the components you would use and the order you would use them:

**(1= first action, 2= second action, and so forth. You do not have to use all components)**

- A 3-week-old, otherwise healthy baby, for a pyloromyotomy. He has been fully resuscitated with IV fluids but the cannula came out during transfer to OT. He has a nasogastric tube in-situ that appears to be draining well.**

| Components                                                                                                                                                        | Use (Circle)                 | Sequence order (Circle) |
|-------------------------------------------------------------------------------------------------------------------------------------------------------------------|------------------------------|-------------------------|
| Site intravenous access                                                                                                                                           | Y / N                        | N/A 1 2 3 4 5 6 7 8     |
| Insert/suction naso/orogastric tube                                                                                                                               | Y / N                        | N/A 1 2 3 4 5 6 7 8     |
| Pre-oxygenation                                                                                                                                                   | Y / N                        | N/A 1 2 3 4 5 6 7 8     |
| Induction                                                                                                                                                         | Intravenous/<br>Inhalational | N/A 1 2 3 4 5 6 7 8     |
| Cricoid pressure                                                                                                                                                  | Y / N                        | N/A 1 2 3 4 5 6 7 8     |
| Appropriate Bag-mask-ventilation                                                                                                                                  | Y / N                        | N/A 1 2 3 4 5 6 7 8     |
| Muscle relaxant                                                                                                                                                   | <u>Circle drug of choice</u> |                         |
| <ul style="list-style-type: none"> <li>Suxamethonium (Sux)</li> <li>Rocuronium (Roc)</li> <li>Cis/-Atracurium (Cis-Atr)</li> <li>None (Ø)</li> </ul>              | Sux / Roc / Cis-Atr/ Ø       | N/A 1 2 3 4 5 6 7 8     |
| Definitive airway control                                                                                                                                         |                              |                         |
| <ul style="list-style-type: none"> <li>Laryngeal mask airway (LMA)</li> <li>Cuffed endotracheal tube (cETT)</li> <li>Uncuffed endotracheal tube (uETT)</li> </ul> | LMA / cETT / uETT            | N/A 1 2 3 4 5 6 7 8     |

2. A 4-year-old, previously healthy child who has suspected small bowel obstruction. He has been unwell for 48hrs, with episodes of vomiting and a tender, distended abdomen. He has an IV line running and has been resuscitated. There is no naso/orogastric tube in place.

| Components                                                                                                                                                        | Use (Circle)                 | Sequence order (Circle) |
|-------------------------------------------------------------------------------------------------------------------------------------------------------------------|------------------------------|-------------------------|
| Site intravenous access                                                                                                                                           | Y / N                        | N/A 1 2 3 4 5 6 7 8     |
| Insert/suction naso/orogastric tube                                                                                                                               | Y / N                        | N/A 1 2 3 4 5 6 7 8     |
| Pre-oxygenation                                                                                                                                                   | Y / N                        | N/A 1 2 3 4 5 6 7 8     |
| Induction                                                                                                                                                         | Intravenous/<br>Inhalational | N/A 1 2 3 4 5 6 7 8     |
| Cricoid pressure                                                                                                                                                  | Y / N                        | N/A 1 2 3 4 5 6 7 8     |
| Appropriate Bag-mask-ventilation                                                                                                                                  | Y / N                        | N/A 1 2 3 4 5 6 7 8     |
| Muscle relaxant                                                                                                                                                   | <u>Circle drug of choice</u> |                         |
| <ul style="list-style-type: none"> <li>Suxamethonium (Sux)</li> <li>Rocuronium (Roc)</li> <li>Cis/-Atracurium (Cis-Atr)</li> <li>None (Ø)</li> </ul>              | Sux / Roc / Cis-Atr/ Ø       | N/A 1 2 3 4 5 6 7 8     |
| Definitive airway control                                                                                                                                         | N/A 1 2 3 4 5 6 7 8          |                         |
| <ul style="list-style-type: none"> <li>Laryngeal mask airway (LMA)</li> <li>Cuffed endotracheal tube (cETT)</li> <li>Uncuffed endotracheal tube (uETT)</li> </ul> | LMA / cETT / uETT            |                         |

3. A 6-year-old, otherwise healthy child who has a painful forearm fracture requiring manipulation. He ate 2hrs prior to the injury and has now been starved for 6hrs since the injury. He has received opioids in the pre-operative period.

| Components                                                                                                                                                        | Use (Circle)                 | Sequence order (Circle) |
|-------------------------------------------------------------------------------------------------------------------------------------------------------------------|------------------------------|-------------------------|
| Site intravenous access                                                                                                                                           | Y / N                        | N/A 1 2 3 4 5 6 7 8     |
| Insert/suction naso/orogastric tube                                                                                                                               | Y / N                        | N/A 1 2 3 4 5 6 7 8     |
| Pre-oxygenation                                                                                                                                                   | Y / N                        | N/A 1 2 3 4 5 6 7 8     |
| Induction                                                                                                                                                         | Intravenous/<br>Inhalational | N/A 1 2 3 4 5 6 7 8     |
| Cricoid pressure                                                                                                                                                  | Y / N                        | N/A 1 2 3 4 5 6 7 8     |
| Appropriate Bag-mask-ventilation                                                                                                                                  | Y / N                        | N/A 1 2 3 4 5 6 7 8     |
| Muscle relaxant                                                                                                                                                   | <u>Circle drug of choice</u> |                         |
| <ul style="list-style-type: none"> <li>Suxamethonium (Sux)</li> <li>Rocuronium (Roc)</li> <li>Cis/-Atracurium (Cis-Atr)</li> <li>None (Ø)</li> </ul>              | Sux / Roc / Cis-Atr/ Ø       | N/A 1 2 3 4 5 6 7 8     |
| Definitive airway control                                                                                                                                         | N/A 1 2 3 4 5 6 7 8          |                         |
| <ul style="list-style-type: none"> <li>Laryngeal mask airway (LMA)</li> <li>Cuffed endotracheal tube (cETT)</li> <li>Uncuffed endotracheal tube (uETT)</li> </ul> | LMA / cETT / uETT            |                         |

4. A 7-year-old with renal failure and ascites who has been booked for Tenckhoff catheter insertion, in order to commence dialysis. It is an elective procedure and the child has been starved:

| Components                                                                                                                                                        | Use (Circle)                 | Sequence order (Circle) |
|-------------------------------------------------------------------------------------------------------------------------------------------------------------------|------------------------------|-------------------------|
| Site intravenous access                                                                                                                                           | Y / N                        | N/A 1 2 3 4 5 6 7 8     |
| Insert/suction naso/orogastric tube                                                                                                                               | Y / N                        | N/A 1 2 3 4 5 6 7 8     |
| Pre-oxygenation                                                                                                                                                   | Y / N                        | N/A 1 2 3 4 5 6 7 8     |
| Induction                                                                                                                                                         | Intravenous/<br>Inhalational | N/A 1 2 3 4 5 6 7 8     |
| Cricoid pressure                                                                                                                                                  | Y / N                        | N/A 1 2 3 4 5 6 7 8     |
| Appropriate Bag-mask-ventilation                                                                                                                                  | Y / N                        | N/A 1 2 3 4 5 6 7 8     |
| Muscle relaxant                                                                                                                                                   | <u>Circle drug of choice</u> |                         |
| <ul style="list-style-type: none"> <li>Suxamethonium (Sux)</li> <li>Rocuronium (Roc)</li> <li>Cis/-Atracurium (Cis-Atr)</li> <li>None (Ø)</li> </ul>              | Sux / Roc / Cis-Atr/ Ø       | N/A 1 2 3 4 5 6 7 8     |
| Definitive airway control                                                                                                                                         |                              | N/A 1 2 3 4 5 6 7 8     |
| <ul style="list-style-type: none"> <li>Laryngeal mask airway (LMA)</li> <li>Cuffed endotracheal tube (cETT)</li> <li>Uncuffed endotracheal tube (uETT)</li> </ul> | LMA / cETT / uETT            |                         |
